# Supplementary material
Source: PubMed Central journal article supplement (PMC4052807)
Supplement: pr401209w_si_001.pdf [file pr401209w_si_001.pdf]

Supporting Information (Figures S1 and S2) for:

**A high-confidence glycosome proteome for procyclic form *Trypanosoma brucei* by epitope-tag organelle enrichment and SILAC proteomics.**

by Guther et al.

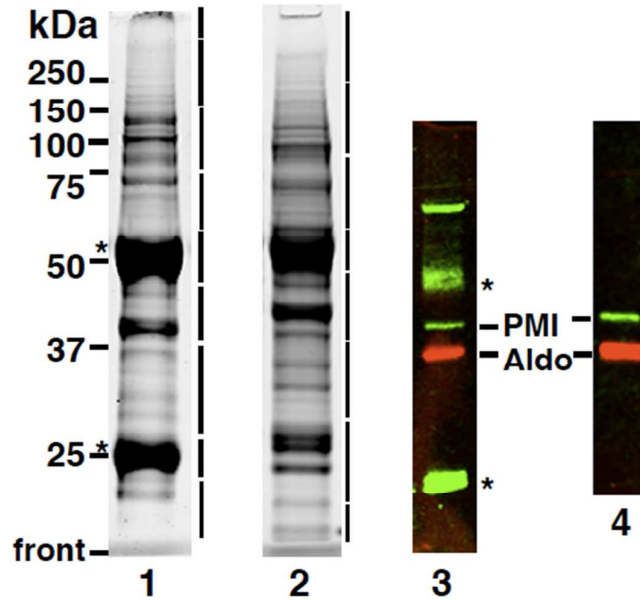

**Figure S1.** SDS-PAGE of glycosome preparations used for proteomics. Samples from experiments 1 and 2 (Table 1) were subjected to SDS-PAGE and stained with colloidal Coomassie blue (lanes 1 and 2, respectively) or were used for Western blotting for known glycosomal proteins using antibodies to aldolase and phosphomannose isomerase (PMI) (lanes 3 and 4, respectively). The regions excised for in-gel reduction, S-alkylation and tryptic digestion are indicated by the black bars. Note: The bands marked with asterisks in lanes 1 and 3 are heavy and light chains from the mouse anti-GFP antibody.

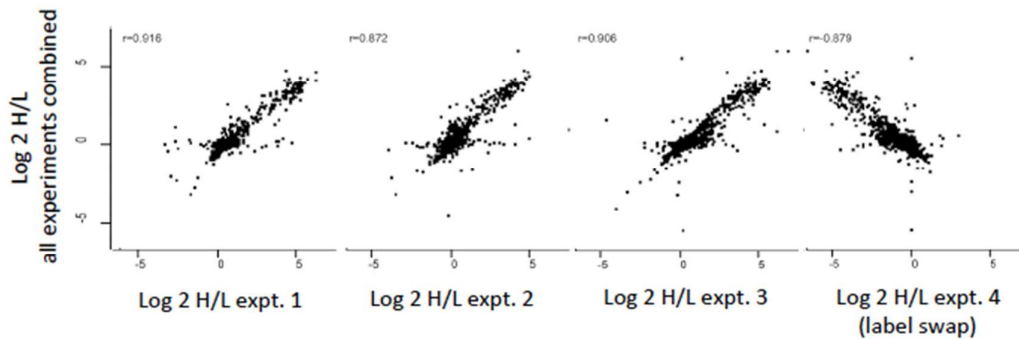

**Figure S2.** Correlation of biological replicate experiments. Pair-wise Pearson correlations of the  $\text{Log}_2$  H/L ratio of the four individual experiments (Table 1) with the final combined data set. Note, in the combined data set the H/L ratios for experiment 4 (label swap) were inverted prior to processing.
